# Supplementary material for: pSLIP: SVM based protein subcellular localization prediction using multiple physicochemical properties
Source: Springer Nature journal article supplement (doi:10.1186/1471-2105-6-152), 2005-06-17
Supplement: 12859_2004_477_MOESM1_ESM.pdf [file 12859_2004_477_MOESM1_ESM.pdf]

# Supplementary Material

Deepak Sarda, Gek Huey Chua, Kuo-Bin Li, Francis Tang and Arun Krishnan\*

May 24, 2005

---

\*To whom correspondence should be addressed.

| Classifier | Best Indices |            |            |            |            |
|------------|--------------|------------|------------|------------|------------|
| (0, 1)     | FUKS010108   | CEDJ970101 | KRIW710101 | NAKH920107 | JUKT750101 |
| (0, 2)     | PONP800103   | BUNA790103 | LEVM760102 | PLIV810101 | OOBM770101 |
| (0, 3)     | FUKS010105   | BUNA790103 | NAKH920104 | CEDJ970101 | NAKH920106 |
| (0, 4)     | KRIW790101   | PLIV810101 | PONP800103 | LEVM760102 | OOBM770101 |
| (0, 5)     | JUKT750101   | KRIW790101 | KRIW710101 | FAUJ880101 | OOBM770101 |
| (1, 2)     | LEVM760102   | FAUJ880107 | TAKK010101 | SIMZ760101 | ZIMJ680105 |
| (1, 3)     | CIDH920104   | QIAN880120 | TAKK010101 | PONP800104 | ZIMJ680105 |
| (1, 4)     | TANS770110   | PONP800103 | PALJ810104 | OOBM770101 | ZIMJ680105 |
| (1, 5)     | NAKH900112   | PONP800103 | FAUJ880101 | PLIV810101 | OOBM770101 |
| (2, 3)     | NAKH900112   | NAKH900109 | TAKK010101 | NAKH900105 | OOBM770101 |
| (2, 4)     | PONP800103   | NAKH900102 | PLIV810101 | OOBM770101 | LEVM760102 |
| (2, 5)     | KRIW710101   | PLIV810101 | JUKT750101 | OOBM850105 | OOBM770101 |
| (3, 4)     | JUKT750101   | ZIMJ680105 | NAKH920102 | PONP800103 | KRIW790101 |
| (3, 5)     | JUKT750101   | KRIW710101 | KRIW790101 | PLIV810101 | OOBM770101 |
| (4, 5)     | JUKT750101   | PONP800103 | KRIW790101 | PLIV810101 | OOBM770101 |

Table 1: The top five indices chosen for each binary classifier: 0: chloroplast 1: cytoplasmic 2: extracellular 3: mitochondrial 4: nuclear 5: plasma membrane

| AAIndex    | Description                                                                                                                                  |
|------------|----------------------------------------------------------------------------------------------------------------------------------------------|
| ANDN920101 | alpha-CH chemical shifts (Andersen et al., 1992)                                                                                             |
| ARGP820101 | Hydrophobicity index (Argos et al., 1982)                                                                                                    |
| ARGP820102 | Signal sequence helical potential (Argos et al., 1982)                                                                                       |
| ARGP820103 | Membrane-buried preference parameters (Argos et al., 1982)                                                                                   |
| BEGF750101 | Conformational parameter of inner helix (Beghin-Dirkx, 1975)                                                                                 |
| BEGF750102 | Conformational parameter of beta-structure (Beghin-Dirkx, 1975)                                                                              |
| BEGF750103 | Conformational parameter of beta-turn (Beghin-Dirkx, 1975)                                                                                   |
| BHAR880101 | Average flexibility indices (Bhaskaran-Ponnuswamy, 1988)                                                                                     |
| BIGC670101 | Residue volume (Bigelow, 1967)                                                                                                               |
| BIOV880101 | Information value for accessibility; average fraction 35% (Biou et al., 1988)                                                                |
| BIOV880102 | Information value for accessibility; average fraction 23% (Biou et al., 1988)                                                                |
| BROC820101 | Retention coefficient in TFA (Browne et al., 1982)                                                                                           |
| BROC820102 | Retention coefficient in HFBA (Browne et al., 1982)                                                                                          |
| BULH740101 | Transfer free energy to surface (Bull-Breese, 1974)                                                                                          |
| BULH740102 | Apparent partial specific volume (Bull-Breese, 1974)                                                                                         |
| BUNA790101 | alpha-NH chemical shifts (Bundi-Wuthrich, 1979)                                                                                              |
| BUNA790102 | alpha-CH chemical shifts (Bundi-Wuthrich, 1979)                                                                                              |
| BUNA790103 | Spin-spin coupling constants 3JHalpha-NH (Bundi-Wuthrich, 1979)                                                                              |
| BURA740101 | Normalized frequency of alpha-helix (Burgess et al., 1974)                                                                                   |
| BURA740102 | Normalized frequency of extended structure (Burgess et al., 1974)                                                                            |
| CHAM810101 | Steric parameter (Charton, 1981)                                                                                                             |
| CHAM820101 | Polarizability parameter (Charton-Charton, 1982)                                                                                             |
| CHAM820102 | Free energy of solution in water, kcal/mole (Charton-Charton, 1982)                                                                          |
| CHAM830101 | The Chou-Fasman parameter of the coil conformation (Charton-Charton, 1983)                                                                   |
| CHAM830102 | A parameter defined from the residuals obtained from the best correlation of the Chou-Fasman parameter of beta-sheet (Charton-Charton, 1983) |
| CHAM830103 | The number of atoms in the side chain labelled 1+1 (Charton-Charton, 1983)                                                                   |
| CHAM830104 | The number of atoms in the side chain labelled 2+1 (Charton-Charton, 1983)                                                                   |
| CHAM830105 | The number of atoms in the side chain labelled 3+1 (Charton-Charton, 1983)                                                                   |
| CHAM830106 | The number of bonds in the longest chain (Charton-Charton, 1983)                                                                             |
| CHAM830107 | A parameter of charge transfer capability (Charton-Charton, 1983)                                                                            |
| CHAM830108 | A parameter of charge transfer donor capability (Charton-Charton, 1983)                                                                      |
| CHOC750101 | Average volume of buried residue (Chothia, 1975)                                                                                             |
| CHOC760101 | Residue accessible surface area in tripeptide (Chothia, 1976)                                                                                |
| CHOC760102 | Residue accessible surface area in folded protein (Chothia, 1976)                                                                            |
| CHOC760103 | Proportion of residues 95% buried (Chothia, 1976)                                                                                            |
| CHOC760104 | Proportion of residues 100% buried (Chothia, 1976)                                                                                           |
| CHOP780101 | Normalized frequency of beta-turn (Chou-Fasman, 1978a)                                                                                       |

| AAIndex    | Description                                                                   |
|------------|-------------------------------------------------------------------------------|
| CHOP780201 | Normalized frequency of alpha-helix (Chou-Fasman, 1978b)                      |
| CHOP780202 | Normalized frequency of beta-sheet (Chou-Fasman, 1978b)                       |
| CHOP780203 | Normalized frequency of beta-turn (Chou-Fasman, 1978b)                        |
| CHOP780204 | Normalized frequency of N-terminal helix (Chou-Fasman, 1978b)                 |
| CHOP780205 | Normalized frequency of C-terminal helix (Chou-Fasman, 1978b)                 |
| CHOP780206 | Normalized frequency of N-terminal non helical region (Chou-Fasman, 1978b)    |
| CHOP780207 | Normalized frequency of C-terminal non helical region (Chou-Fasman, 1978b)    |
| CHOP780208 | Normalized frequency of N-terminal beta-sheet (Chou-Fasman, 1978b)            |
| CHOP780209 | Normalized frequency of C-terminal beta-sheet (Chou-Fasman, 1978b)            |
| CHOP780210 | Normalized frequency of N-terminal non beta region (Chou-Fasman, 1978b)       |
| CHOP780211 | Normalized frequency of C-terminal non beta region (Chou-Fasman, 1978b)       |
| CHOP780212 | Frequency of the 1st residue in turn (Chou-Fasman, 1978b)                     |
| CHOP780213 | Frequency of the 2nd residue in turn (Chou-Fasman, 1978b)                     |
| CHOP780214 | Frequency of the 3rd residue in turn (Chou-Fasman, 1978b)                     |
| CHOP780215 | Frequency of the 4th residue in turn (Chou-Fasman, 1978b)                     |
| CHOP780216 | Normalized frequency of the 2nd and 3rd residues in turn (Chou-Fasman, 1978b) |
| CIDH920101 | Normalized hydrophobicity scales for alpha-proteins (Cid et al., 1992)        |
| CIDH920102 | Normalized hydrophobicity scales for beta-proteins (Cid et al., 1992)         |
| CIDH920103 | Normalized hydrophobicity scales for alpha+beta-proteins (Cid et al., 1992)   |
| CIDH920104 | Normalized hydrophobicity scales for alpha/beta-proteins (Cid et al., 1992)   |
| CIDH920105 | Normalized average hydrophobicity scales (Cid et al., 1992)                   |
| COHE430101 | Partial specific volume (Cohn-Edsall, 1943)                                   |
| CRAJ730101 | Normalized frequency of middle helix (Crawford et al., 1973)                  |
| CRAJ730102 | Normalized frequency of beta-sheet (Crawford et al., 1973)                    |
| CRAJ730103 | Normalized frequency of turn (Crawford et al., 1973)                          |
| DAWD720101 | Size (Dawson, 1972)                                                           |
| DAYM780101 | Amino acid composition (Dayhoff et al., 1978a)                                |
| DAYM780201 | Relative mutability (Dayhoff et al., 1978b)                                   |
| DESM900101 | Membrane preference for cytochrome b: MPH89 (Degli Esposti et al., 1990)      |
| DESM900102 | Average membrane preference: AMP07 (Degli Esposti et al., 1990)               |
| EISD840101 | Consensus normalized hydrophobicity scale (Eisenberg, 1984)                   |
| EISD860101 | Solvation free energy (Eisenberg-McLachlan, 1986)                             |
| EISD860102 | Atom-based hydrophobic moment (Eisenberg-McLachlan, 1986)                     |
| EISD860103 | Direction of hydrophobic moment (Eisenberg-McLachlan, 1986)                   |
| FASG760101 | Molecular weight (Fasman, 1976)                                               |
| FASG760102 | Melting point (Fasman, 1976)                                                  |
| FASG760103 | Optical rotation (Fasman, 1976)                                               |
| FASG760104 | pK-N (Fasman, 1976)                                                           |
| FASG760105 | pK-C (Fasman, 1976)                                                           |

| AAIndex    | Description                                                                  |
|------------|------------------------------------------------------------------------------|
| FAUJ830101 | Hydrophobic parameter pi (Fauchere-Pliska, 1983)                             |
| FAUJ880101 | Graph shape index (Fauchere et al., 1988)                                    |
| FAUJ880102 | Smoothed epsilon steric parameter (Fauchere et al., 1988)                    |
| FAUJ880103 | Normalized van der Waals volume (Fauchere et al., 1988)                      |
| FAUJ880104 | STERIMOL length of the side chain (Fauchere et al., 1988)                    |
| FAUJ880105 | STERIMOL minimum width of the side chain (Fauchere et al., 1988)             |
| FAUJ880106 | STERIMOL maximum width of the side chain (Fauchere et al., 1988)             |
| FAUJ880107 | N.m.r. chemical shift of alpha-carbon (Fauchere et al., 1988)                |
| FAUJ880108 | Localized electrical effect (Fauchere et al., 1988)                          |
| FAUJ880109 | Number of hydrogen bond donors (Fauchere et al., 1988)                       |
| FAUJ880110 | Number of full nonbonding orbitals (Fauchere et al., 1988)                   |
| FAUJ880111 | Positive charge (Fauchere et al., 1988)                                      |
| FAUJ880112 | Negative charge (Fauchere et al., 1988)                                      |
| FAUJ880113 | pK-a(RCOOH) (Fauchere et al., 1988)                                          |
| FINA770101 | Helix-coil equilibrium constant (Finkelstein-Ptitsyn, 1977)                  |
| FINA910101 | Helix initiation parameter at position i-1 (Finkelstein et al., 1991)        |
| FINA910102 | Helix initiation parameter at position i,i+1,i+2 (Finkelstein et al., 1991)  |
| FINA910103 | Helix termination parameter at position j-2,j-1,j (Finkelstein et al., 1991) |
| FINA910104 | Helix termination parameter at position j+1 (Finkelstein et al., 1991)       |
| GARJ730101 | Partition coefficient (Garel et al., 1973)                                   |
| GEIM800101 | Alpha-helix indices (Geisow-Roberts, 1980)                                   |
| GEIM800102 | Alpha-helix indices for alpha-proteins (Geisow-Roberts, 1980)                |
| GEIM800103 | Alpha-helix indices for beta-proteins (Geisow-Roberts, 1980)                 |
| GEIM800104 | Alpha-helix indices for alpha/beta-proteins (Geisow-Roberts, 1980)           |
| GEIM800105 | Beta-strand indices (Geisow-Roberts, 1980)                                   |
| GEIM800106 | Beta-strand indices for beta-proteins (Geisow-Roberts, 1980)                 |
| GEIM800107 | Beta-strand indices for alpha/beta-proteins (Geisow-Roberts, 1980)           |
| GEIM800108 | Aperiodic indices (Geisow-Roberts, 1980)                                     |
| GEIM800109 | Aperiodic indices for alpha-proteins (Geisow-Roberts, 1980)                  |
| GEIM800110 | Aperiodic indices for beta-proteins (Geisow-Roberts, 1980)                   |
| GEIM800111 | Aperiodic indices for alpha/beta-proteins (Geisow-Roberts, 1980)             |
| GOLD730101 | Hydrophobicity factor (Goldsack-Chalifoux, 1973)                             |
| GOLD730102 | Residue volume (Goldsack-Chalifoux, 1973)                                    |
| GRAR740101 | Composition (Grantham, 1974)                                                 |
| GRAR740102 | Polarity (Grantham, 1974)                                                    |
| GRAR740103 | Volume (Grantham, 1974)                                                      |
| GUYH850101 | Partition energy (Guy, 1985)                                                 |
| HOPA770101 | Hydration number (Hopfinger, 1971), Cited by Charton-Charton (1982)          |
| HOPT810101 | Hydrophilicity value (Hopp-Woods, 1981)                                      |

| AAIndex    | Description                                                               |
|------------|---------------------------------------------------------------------------|
| HUTJ700101 | Heat capacity (Hutchens, 1970)                                            |
| HUTJ700102 | Absolute entropy (Hutchens, 1970)                                         |
| HUTJ700103 | Entropy of formation (Hutchens, 1970)                                     |
| ISOY800101 | Normalized relative frequency of alpha-helix (Isogai et al., 1980)        |
| ISOY800102 | Normalized relative frequency of extended structure (Isogai et al., 1980) |
| ISOY800103 | Normalized relative frequency of bend (Isogai et al., 1980)               |
| ISOY800104 | Normalized relative frequency of bend R (Isogai et al., 1980)             |
| ISOY800105 | Normalized relative frequency of bend S (Isogai et al., 1980)             |
| ISOY800106 | Normalized relative frequency of helix end (Isogai et al., 1980)          |
| ISOY800107 | Normalized relative frequency of double bend (Isogai et al., 1980)        |
| ISOY800108 | Normalized relative frequency of coil (Isogai et al., 1980)               |
| JANJ780101 | Average accessible surface area (Janin et al., 1978)                      |
| JANJ780102 | Percentage of buried residues (Janin et al., 1978)                        |
| JANJ780103 | Percentage of exposed residues (Janin et al., 1978)                       |
| JANJ790101 | Ratio of buried and accessible molar fractions (Janin, 1979)              |
| JANJ790102 | Transfer free energy (Janin, 1979)                                        |
| JOND750101 | Hydrophobicity (Jones, 1975)                                              |
| JOND750102 | pK (-COOH) (Jones, 1975)                                                  |
| JOND920101 | Relative frequency of occurrence (Jones et al., 1992)                     |
| JOND920102 | Relative mutability (Jones et al., 1992)                                  |
| JUKT750101 | Amino acid distribution (Jukes et al., 1975)                              |
| JUNJ780101 | Sequence frequency (Jungck, 1978)                                         |
| KANM800101 | Average relative probability of helix (Kanehisa-Tsong, 1980)              |
| KANM800102 | Average relative probability of beta-sheet (Kanehisa-Tsong, 1980)         |
| KANM800103 | Average relative probability of inner helix (Kanehisa-Tsong, 1980)        |
| KANM800104 | Average relative probability of inner beta-sheet (Kanehisa-Tsong, 1980)   |
| KARP850101 | Flexibility parameter for no rigid neighbors (Karplus-Schulz, 1985)       |
| KARP850102 | Flexibility parameter for one rigid neighbor (Karplus-Schulz, 1985)       |
| KARP850103 | Flexibility parameter for two rigid neighbors (Karplus-Schulz, 1985)      |
| KHAG800101 | The Kerr-constant increments (Khanarian-Moore, 1980)                      |
| KLEP840101 | Net charge (Klein et al., 1984)                                           |
| KRIW710101 | Side chain interaction parameter (Krigbaum-Rubin, 1971)                   |
| KRIW790101 | Side chain interaction parameter (Krigbaum-Komoriya, 1979)                |
| KRIW790102 | Fraction of site occupied by water (Krigbaum-Komoriya, 1979)              |
| KRIW790103 | Side chain volume (Krigbaum-Komoriya, 1979)                               |
| KYTJ820101 | Hydrophathy index (Kyte-Doolittle, 1982)                                  |
| LAWE840101 | Transfer free energy, CHP/water (Lawson et al., 1984)                     |
| LEVM760101 | Hydrophobic parameter (Levitt, 1976)                                      |
| LEVM760102 | Distance between C-alpha and centroid of side chain (Levitt, 1976)        |

| AAIndex    | Description                                                                   |
|------------|-------------------------------------------------------------------------------|
| LEVM760103 | Side chain angle theta(AAR) (Levitt, 1976)                                    |
| LEVM760104 | Side chain torsion angle phi(AAAR) (Levitt, 1976)                             |
| LEVM760105 | Radius of gyration of side chain (Levitt, 1976)                               |
| LEVM760106 | van der Waals parameter R0 (Levitt, 1976)                                     |
| LEVM760107 | van der Waals parameter epsilon (Levitt, 1976)                                |
| LEVM780101 | Normalized frequency of alpha-helix, with weights (Levitt, 1978)              |
| LEVM780102 | Normalized frequency of beta-sheet, with weights (Levitt, 1978)               |
| LEVM780103 | Normalized frequency of reverse turn, with weights (Levitt, 1978)             |
| LEVM780104 | Normalized frequency of alpha-helix, unweighted (Levitt, 1978)                |
| LEVM780105 | Normalized frequency of beta-sheet, unweighted (Levitt, 1978)                 |
| LEVM780106 | Normalized frequency of reverse turn, unweighted (Levitt, 1978)               |
| LEWP710101 | Frequency of occurrence in beta-bends (Lewis et al., 1971)                    |
| LIFS790101 | Conformational preference for all beta-strands (Lifson-Sander, 1979)          |
| LIFS790102 | Conformational preference for parallel beta-strands (Lifson-Sander, 1979)     |
| LIFS790103 | Conformational preference for antiparallel beta-strands (Lifson-Sander, 1979) |
| MANP780101 | Average surrounding hydrophobicity (Manavalan-Ponnuswamy, 1978)               |
| MAXF760101 | Normalized frequency of alpha-helix (Maxfield-Scheraga, 1976)                 |
| MAXF760102 | Normalized frequency of extended structure (Maxfield-Scheraga, 1976)          |
| MAXF760103 | Normalized frequency of zeta R (Maxfield-Scheraga, 1976)                      |
| MAXF760104 | Normalized frequency of left-handed alpha-helix (Maxfield-Scheraga, 1976)     |
| MAXF760105 | Normalized frequency of zeta L (Maxfield-Scheraga, 1976)                      |
| MAXF760106 | Normalized frequency of alpha region (Maxfield-Scheraga, 1976)                |
| MCMT640101 | Refractivity (McMeekin et al., 1964), Cited by Jones (1975)                   |
| MEEJ800101 | Retention coefficient in HPLC, pH7.4 (Meek, 1980)                             |
| MEEJ800102 | Retention coefficient in HPLC, pH2.1 (Meek, 1980)                             |
| MEEJ810101 | Retention coefficient in NaClO4 (Meek-Rossetti, 1981)                         |
| MEEJ810102 | Retention coefficient in NaH2PO4 (Meek-Rossetti, 1981)                        |
| MEIH800101 | Average reduced distance for C-alpha (Meirovitch et al., 1980)                |
| MEIH800102 | Average reduced distance for side chain (Meirovitch et al., 1980)             |
| MEIH800103 | Average side chain orientation angle (Meirovitch et al., 1980)                |
| MIYS850101 | Effective partition energy (Miyazawa-Jernigan, 1985)                          |
| NAGK730101 | Normalized frequency of alpha-helix (Nagano, 1973)                            |
| NAGK730102 | Normalized frequency of beta-structure (Nagano, 1973)                         |
| NAGK730103 | Normalized frequency of coil (Nagano, 1973)                                   |
| NAKH900101 | AA composition of total proteins (Nakashima et al., 1990)                     |
| NAKH900102 | SD of AA composition of total proteins (Nakashima et al., 1990)               |
| NAKH900103 | AA composition of mt-proteins (Nakashima et al., 1990)                        |
| NAKH900104 | Normalized composition of mt-proteins (Nakashima et al., 1990)                |
| NAKH900105 | AA composition of mt-proteins from animal (Nakashima et al., 1990)            |

| AAIndex    | Description                                                                    |
|------------|--------------------------------------------------------------------------------|
| NAKH900106 | Normalized composition from animal (Nakashima et al., 1990)                    |
| NAKH900107 | AA composition of mt-proteins from fungi and plant (Nakashima et al., 1990)    |
| NAKH900108 | Normalized composition from fungi and plant (Nakashima et al., 1990)           |
| NAKH900109 | AA composition of membrane proteins (Nakashima et al., 1990)                   |
| NAKH900110 | Normalized composition of membrane proteins (Nakashima et al., 1990)           |
| NAKH900111 | Transmembrane regions of non-mt-proteins (Nakashima et al., 1990)              |
| NAKH900112 | Transmembrane regions of mt-proteins (Nakashima et al., 1990)                  |
| NAKH900113 | Ratio of average and computed composition (Nakashima et al., 1990)             |
| NAKH920101 | AA composition of CYT of single-spanning proteins (Nakashima-Nishikawa, 1992)  |
| NAKH920102 | AA composition of CYT2 of single-spanning proteins (Nakashima-Nishikawa, 1992) |
| NAKH920103 | AA composition of EXT of single-spanning proteins (Nakashima-Nishikawa, 1992)  |
| NAKH920104 | AA composition of EXT2 of single-spanning proteins (Nakashima-Nishikawa, 1992) |
| NAKH920105 | AA composition of MEM of single-spanning proteins (Nakashima-Nishikawa, 1992)  |
| NAKH920106 | AA composition of CYT of multi-spanning proteins (Nakashima-Nishikawa, 1992)   |
| NAKH920107 | AA composition of EXT of multi-spanning proteins (Nakashima-Nishikawa, 1992)   |
| NAKH920108 | AA composition of MEM of multi-spanning proteins (Nakashima-Nishikawa, 1992)   |
| NISK800101 | 8 A contact number (Nishikawa-Ooi, 1980)                                       |
| NISK860101 | 14 A contact number (Nishikawa-Ooi, 1986)                                      |
| NOZY710101 | Transfer energy, organic solvent/water (Nozaki-Tanford, 1971)                  |
| OOBM770101 | Average non-bonded energy per atom (Oobatake-Ooi, 1977)                        |
| OOBM770102 | Short and medium range non-bonded energy per atom (Oobatake-Ooi, 1977)         |
| OOBM770103 | Long range non-bonded energy per atom (Oobatake-Ooi, 1977)                     |
| OOBM770104 | Average non-bonded energy per residue (Oobatake-Ooi, 1977)                     |
| OOBM770105 | Short and medium range non-bonded energy per residue (Oobatake-Ooi, 1977)      |
| OOBM850101 | Optimized beta-structure-coil equilibrium constant (Oobatake et al., 1985)     |
| OOBM850102 | Optimized propensity to form reverse turn (Oobatake et al., 1985)              |
| OOBM850103 | Optimized transfer energy parameter (Oobatake et al., 1985)                    |
| OOBM850104 | Optimized average non-bonded energy per atom (Oobatake et al., 1985)           |
| OOBM850105 | Optimized side chain interaction parameter (Oobatake et al., 1985)             |
| PALJ810101 | Normalized frequency of alpha-helix from LG (Palau et al., 1981)               |
| PALJ810102 | Normalized frequency of alpha-helix from CF (Palau et al., 1981)               |
| PALJ810103 | Normalized frequency of beta-sheet from LG (Palau et al., 1981)                |
| PALJ810104 | Normalized frequency of beta-sheet from CF (Palau et al., 1981)                |
| PALJ810105 | Normalized frequency of turn from LG (Palau et al., 1981)                      |
| PALJ810106 | Normalized frequency of turn from CF (Palau et al., 1981)                      |
| PALJ810107 | Normalized frequency of alpha-helix in all-alpha class (Palau et al., 1981)    |
| PALJ810108 | Normalized frequency of alpha-helix in alpha+beta class (Palau et al., 1981)   |
| PALJ810109 | Normalized frequency of alpha-helix in alpha/beta class (Palau et al., 1981)   |
| PALJ810110 | Normalized frequency of beta-sheet in all-beta class (Palau et al., 1981)      |



| AAIndex    | Description                                                                   |
|------------|-------------------------------------------------------------------------------|
| PALJ810111 | Normalized frequency of beta-sheet in alpha+beta class (Palau et al., 1981)   |
| PALJ810112 | Normalized frequency of beta-sheet in alpha/beta class (Palau et al., 1981)   |
| PALJ810113 | Normalized frequency of turn in all-alpha class (Palau et al., 1981)          |
| PALJ810114 | Normalized frequency of turn in all-beta class (Palau et al., 1981)           |
| PALJ810115 | Normalized frequency of turn in alpha+beta class (Palau et al., 1981)         |
| PALJ810116 | Normalized frequency of turn in alpha/beta class (Palau et al., 1981)         |
| PARJ860101 | HPLC parameter (Parker et al., 1986)                                          |
| PLIV810101 | Partition coefficient (Pliska et al., 1981)                                   |
| PONP800101 | Surrounding hydrophobicity in folded form (Ponnuswamy et al., 1980)           |
| PONP800102 | Average gain in surrounding hydrophobicity (Ponnuswamy et al., 1980)          |
| PONP800103 | Average gain ratio in surrounding hydrophobicity (Ponnuswamy et al., 1980)    |
| PONP800104 | Surrounding hydrophobicity in alpha-helix (Ponnuswamy et al., 1980)           |
| PONP800105 | Surrounding hydrophobicity in beta-sheet (Ponnuswamy et al., 1980)            |
| PONP800106 | Surrounding hydrophobicity in turn (Ponnuswamy et al., 1980)                  |
| PONP800107 | Accessibility reduction ratio (Ponnuswamy et al., 1980)                       |
| PONP800108 | Average number of surrounding residues (Ponnuswamy et al., 1980)              |
| PRAM820101 | Intercept in regression analysis (Prabhakaran-Ponnuswamy, 1982)               |
| PRAM820102 | Slope in regression analysis x 1.0E1 (Prabhakaran-Ponnuswamy, 1982)           |
| PRAM820103 | Correlation coefficient in regression analysis (Prabhakaran-Ponnuswamy, 1982) |
| PRAM900101 | Hydrophobicity (Prabhakaran, 1990)                                            |
| PRAM900102 | Relative frequency in alpha-helix (Prabhakaran, 1990)                         |
| PRAM900103 | Relative frequency in beta-sheet (Prabhakaran, 1990)                          |
| PRAM900104 | Relative frequency in reverse-turn (Prabhakaran, 1990)                        |
| PTIO830101 | Helix-coil equilibrium constant (Ptitsyn-Finkelstein, 1983)                   |
| PTIO830102 | Beta-coil equilibrium constant (Ptitsyn-Finkelstein, 1983)                    |
| QIAN880101 | Weights for alpha-helix at the window position of -6 (Qian-Sejnowski, 1988)   |
| QIAN880102 | Weights for alpha-helix at the window position of -5 (Qian-Sejnowski, 1988)   |
| QIAN880103 | Weights for alpha-helix at the window position of -4 (Qian-Sejnowski, 1988)   |
| QIAN880104 | Weights for alpha-helix at the window position of -3 (Qian-Sejnowski, 1988)   |
| QIAN880105 | Weights for alpha-helix at the window position of -2 (Qian-Sejnowski, 1988)   |
| QIAN880106 | Weights for alpha-helix at the window position of -1 (Qian-Sejnowski, 1988)   |
| QIAN880107 | Weights for alpha-helix at the window position of 0 (Qian-Sejnowski, 1988)    |
| QIAN880108 | Weights for alpha-helix at the window position of 1 (Qian-Sejnowski, 1988)    |
| QIAN880109 | Weights for alpha-helix at the window position of 2 (Qian-Sejnowski, 1988)    |
| QIAN880110 | Weights for alpha-helix at the window position of 3 (Qian-Sejnowski, 1988)    |
| QIAN880111 | Weights for alpha-helix at the window position of 4 (Qian-Sejnowski, 1988)    |
| QIAN880112 | Weights for alpha-helix at the window position of 5 (Qian-Sejnowski, 1988)    |
| QIAN880113 | Weights for alpha-helix at the window position of 6 (Qian-Sejnowski, 1988)    |
| QIAN880114 | Weights for beta-sheet at the window position of -6 (Qian-Sejnowski, 1988)    |

| AAIndex    | Description                                                                  |
|------------|------------------------------------------------------------------------------|
| QIAN880115 | Weights for beta-sheet at the window position of -5 (Qian-Sejnowski, 1988)   |
| QIAN880116 | Weights for beta-sheet at the window position of -4 (Qian-Sejnowski, 1988)   |
| QIAN880117 | Weights for beta-sheet at the window position of -3 (Qian-Sejnowski, 1988)   |
| QIAN880118 | Weights for beta-sheet at the window position of -2 (Qian-Sejnowski, 1988)   |
| QIAN880119 | Weights for beta-sheet at the window position of -1 (Qian-Sejnowski, 1988)   |
| QIAN880120 | Weights for beta-sheet at the window position of 0 (Qian-Sejnowski, 1988)    |
| QIAN880121 | Weights for beta-sheet at the window position of 1 (Qian-Sejnowski, 1988)    |
| QIAN880122 | Weights for beta-sheet at the window position of 2 (Qian-Sejnowski, 1988)    |
| QIAN880123 | Weights for beta-sheet at the window position of 3 (Qian-Sejnowski, 1988)    |
| QIAN880124 | Weights for beta-sheet at the window position of 4 (Qian-Sejnowski, 1988)    |
| QIAN880125 | Weights for beta-sheet at the window position of 5 (Qian-Sejnowski, 1988)    |
| QIAN880126 | Weights for beta-sheet at the window position of 6 (Qian-Sejnowski, 1988)    |
| QIAN880127 | Weights for coil at the window position of -6 (Qian-Sejnowski, 1988)         |
| QIAN880128 | Weights for coil at the window position of -5 (Qian-Sejnowski, 1988)         |
| QIAN880129 | Weights for coil at the window position of -4 (Qian-Sejnowski, 1988)         |
| QIAN880130 | Weights for coil at the window position of -3 (Qian-Sejnowski, 1988)         |
| QIAN880131 | Weights for coil at the window position of -2 (Qian-Sejnowski, 1988)         |
| QIAN880132 | Weights for coil at the window position of -1 (Qian-Sejnowski, 1988)         |
| QIAN880133 | Weights for coil at the window position of 0 (Qian-Sejnowski, 1988)          |
| QIAN880134 | Weights for coil at the window position of 1 (Qian-Sejnowski, 1988)          |
| QIAN880135 | Weights for coil at the window position of 2 (Qian-Sejnowski, 1988)          |
| QIAN880136 | Weights for coil at the window position of 3 (Qian-Sejnowski, 1988)          |
| QIAN880137 | Weights for coil at the window position of 4 (Qian-Sejnowski, 1988)          |
| QIAN880138 | Weights for coil at the window position of 5 (Qian-Sejnowski, 1988)          |
| QIAN880139 | Weights for coil at the window position of 6 (Qian-Sejnowski, 1988)          |
| RACS770101 | Average reduced distance for C-alpha (Rackovsky-Scheraga, 1977)              |
| RACS770102 | Average reduced distance for side chain (Rackovsky-Scheraga, 1977)           |
| RACS770103 | Side chain orientational preference (Rackovsky-Scheraga, 1977)               |
| RACS820101 | Average relative fractional occurrence in A0(i) (Rackovsky-Scheraga, 1982)   |
| RACS820102 | Average relative fractional occurrence in AR(i) (Rackovsky-Scheraga, 1982)   |
| RACS820103 | Average relative fractional occurrence in AL(i) (Rackovsky-Scheraga, 1982)   |
| RACS820104 | Average relative fractional occurrence in EL(i) (Rackovsky-Scheraga, 1982)   |
| RACS820105 | Average relative fractional occurrence in E0(i) (Rackovsky-Scheraga, 1982)   |
| RACS820106 | Average relative fractional occurrence in ER(i) (Rackovsky-Scheraga, 1982)   |
| RACS820107 | Average relative fractional occurrence in A0(i-1) (Rackovsky-Scheraga, 1982) |
| RACS820108 | Average relative fractional occurrence in AR(i-1) (Rackovsky-Scheraga, 1982) |
| RACS820109 | Average relative fractional occurrence in AL(i-1) (Rackovsky-Scheraga, 1982) |
| RACS820110 | Average relative fractional occurrence in EL(i-1) (Rackovsky-Scheraga, 1982) |
| RACS820111 | Average relative fractional occurrence in E0(i-1) (Rackovsky-Scheraga, 1982) |

| AAIndex    | Description                                                                  |
|------------|------------------------------------------------------------------------------|
| RACS820112 | Average relative fractional occurrence in ER(i-1) (Rackovsky-Scheraga, 1982) |
| RACS820113 | Value of theta(i) (Rackovsky-Scheraga, 1982)                                 |
| RACS820114 | Value of theta(i-1) (Rackovsky-Scheraga, 1982)                               |
| RADA880101 | Transfer free energy from chx to wat (Radzicka-Wolfenden, 1988)              |
| RADA880102 | Transfer free energy from oct to wat (Radzicka-Wolfenden, 1988)              |
| RADA880103 | Transfer free energy from vap to chx (Radzicka-Wolfenden, 1988)              |
| RADA880104 | Transfer free energy from chx to oct (Radzicka-Wolfenden, 1988)              |
| RADA880105 | Transfer free energy from vap to oct (Radzicka-Wolfenden, 1988)              |
| RADA880106 | Accessible surface area (Radzicka-Wolfenden, 1988)                           |
| RADA880107 | Energy transfer from out to in(95%buried) (Radzicka-Wolfenden, 1988)         |
| RADA880108 | Mean polarity (Radzicka-Wolfenden, 1988)                                     |
| RICJ880101 | Relative preference value at N <sup>''</sup> (Richardson-Richardson, 1988)   |
| RICJ880102 | Relative preference value at N <sup>'</sup> (Richardson-Richardson, 1988)    |
| RICJ880103 | Relative preference value at N-cap (Richardson-Richardson, 1988)             |
| RICJ880104 | Relative preference value at N1 (Richardson-Richardson, 1988)                |
| RICJ880105 | Relative preference value at N2 (Richardson-Richardson, 1988)                |
| RICJ880106 | Relative preference value at N3 (Richardson-Richardson, 1988)                |
| RICJ880107 | Relative preference value at N4 (Richardson-Richardson, 1988)                |
| RICJ880108 | Relative preference value at N5 (Richardson-Richardson, 1988)                |
| RICJ880109 | Relative preference value at Mid (Richardson-Richardson, 1988)               |
| RICJ880110 | Relative preference value at C5 (Richardson-Richardson, 1988)                |
| RICJ880111 | Relative preference value at C4 (Richardson-Richardson, 1988)                |
| RICJ880112 | Relative preference value at C3 (Richardson-Richardson, 1988)                |
| RICJ880113 | Relative preference value at C2 (Richardson-Richardson, 1988)                |
| RICJ880114 | Relative preference value at C1 (Richardson-Richardson, 1988)                |
| RICJ880115 | Relative preference value at C-cap (Richardson-Richardson, 1988)             |
| RICJ880116 | Relative preference value at C <sup>'</sup> (Richardson-Richardson, 1988)    |
| RICJ880117 | Relative preference value at C <sup>''</sup> (Richardson-Richardson, 1988)   |
| ROBB760101 | Information measure for alpha-helix (Robson-Suzuki, 1976)                    |
| ROBB760102 | Information measure for N-terminal helix (Robson-Suzuki, 1976)               |
| ROBB760103 | Information measure for middle helix (Robson-Suzuki, 1976)                   |
| ROBB760104 | Information measure for C-terminal helix (Robson-Suzuki, 1976)               |
| ROBB760105 | Information measure for extended (Robson-Suzuki, 1976)                       |
| ROBB760106 | Information measure for pleated-sheet (Robson-Suzuki, 1976)                  |
| ROBB760107 | Information measure for extended without H-bond (Robson-Suzuki, 1976)        |
| ROBB760108 | Information measure for turn (Robson-Suzuki, 1976)                           |
| ROBB760109 | Information measure for N-terminal turn (Robson-Suzuki, 1976)                |
| ROBB760110 | Information measure for middle turn (Robson-Suzuki, 1976)                    |
| ROBB760111 | Information measure for C-terminal turn (Robson-Suzuki, 1976)                |

| AAIndex    | Description                                                            |
|------------|------------------------------------------------------------------------|
| ROBB760112 | Information measure for coil (Robson-Suzuki, 1976)                     |
| ROBB760113 | Information measure for loop (Robson-Suzuki, 1976)                     |
| ROBB790101 | Hydration free energy (Robson-Osguthorpe, 1979)                        |
| ROSG850101 | Mean area buried on transfer (Rose et al., 1985)                       |
| ROSG850102 | Mean fractional area loss (Rose et al., 1985)                          |
| ROSM880101 | Side chain hydrophathy, uncorrected for solvation (Roseman, 1988)      |
| ROSM880102 | Side chain hydrophathy, corrected for solvation (Roseman, 1988)        |
| ROSM880103 | Loss of Side chain hydrophathy by helix formation (Roseman, 1988)      |
| SIMZ760101 | Transfer free energy (Simon, 1976), Cited by Charton-Charton (1982)    |
| SNEP660101 | Principal component I (Sneath, 1966)                                   |
| SNEP660102 | Principal component II (Sneath, 1966)                                  |
| SNEP660103 | Principal component III (Sneath, 1966)                                 |
| SNEP660104 | Principal component IV (Sneath, 1966)                                  |
| SUEM840101 | Zimm-Bragg parameter s at 20 C (Sueki et al., 1984)                    |
| SUEM840102 | Zimm-Bragg parameter sigma x 1.0E4 (Sueki et al., 1984)                |
| SWER830101 | Optimal matching hydrophobicity (Sweet-Eisenberg, 1983)                |
| TANS770101 | Normalized frequency of alpha-helix (Tanaka-Scheraga, 1977)            |
| TANS770102 | Normalized frequency of isolated helix (Tanaka-Scheraga, 1977)         |
| TANS770103 | Normalized frequency of extended structure (Tanaka-Scheraga, 1977)     |
| TANS770104 | Normalized frequency of chain reversal R (Tanaka-Scheraga, 1977)       |
| TANS770105 | Normalized frequency of chain reversal S (Tanaka-Scheraga, 1977)       |
| TANS770106 | Normalized frequency of chain reversal D (Tanaka-Scheraga, 1977)       |
| TANS770107 | Normalized frequency of left-handed helix (Tanaka-Scheraga, 1977)      |
| TANS770108 | Normalized frequency of zeta R (Tanaka-Scheraga, 1977)                 |
| TANS770109 | Normalized frequency of coil (Tanaka-Scheraga, 1977)                   |
| TANS770110 | Normalized frequency of chain reversal (Tanaka-Scheraga, 1977)         |
| VASM830101 | Relative population of conformational state A (Vasquez et al., 1983)   |
| VASM830102 | Relative population of conformational state C (Vasquez et al., 1983)   |
| VASM830103 | Relative population of conformational state E (Vasquez et al., 1983)   |
| VELV850101 | Electron-ion interaction potential (Veljkovic et al., 1985)            |
| VENT840101 | Bitterness (Venanzi, 1984)                                             |
| VHEG790101 | Transfer free energy to lipophilic phase (von Heijne-Blomberg, 1979)   |
| WARP780101 | Average interactions per side chain atom (Warme-Morgan, 1978)          |
| WEBA780101 | RF value in high salt chromatography (Weber-Lacey, 1978)               |
| WERD780101 | Propensity to be buried inside (Wertz-Scheraga, 1978)                  |
| WERD780102 | Free energy change of epsilon(i) to epsilon(ex) (Wertz-Scheraga, 1978) |
| WERD780103 | Free energy change of alpha(Ri) to alpha(Rh) (Wertz-Scheraga, 1978)    |
| WERD780104 | Free energy change of epsilon(i) to alpha(Rh) (Wertz-Scheraga, 1978)   |
| WOEC730101 | Polar requirement (Woese, 1973)                                        |

| AAIndex    | Description                                                                                                              |
|------------|--------------------------------------------------------------------------------------------------------------------------|
| WOLR810101 | Hydration potential (Wolfenden et al., 1981)                                                                             |
| WOLS870101 | Principal property value z1 (Wold et al., 1987)                                                                          |
| WOLS870102 | Principal property value z2 (Wold et al., 1987)                                                                          |
| WOLS870103 | Principal property value z3 (Wold et al., 1987)                                                                          |
| YUTK870101 | Unfolding Gibbs energy in water, pH7.0 (Yutani et al., 1987)                                                             |
| YUTK870102 | Unfolding Gibbs energy in water, pH9.0 (Yutani et al., 1987)                                                             |
| YUTK870103 | Activation Gibbs energy of unfolding, pH7.0 (Yutani et al., 1987)                                                        |
| YUTK870104 | Activation Gibbs energy of unfolding, pH9.0 (Yutani et al., 1987)                                                        |
| ZASB820101 | Dependence of partition coefficient on ionic strength (Zaslavsky et al., 1982)                                           |
| ZIMJ680101 | Hydrophobicity (Zimmerman et al., 1968)                                                                                  |
| ZIMJ680102 | Bulkiness (Zimmerman et al., 1968)                                                                                       |
| ZIMJ680103 | Polarity (Zimmerman et al., 1968)                                                                                        |
| ZIMJ680104 | Isoelectric point (Zimmerman et al., 1968)                                                                               |
| ZIMJ680105 | RF rank (Zimmerman et al., 1968)                                                                                         |
| AURR980101 | Normalized positional residue frequency at helix termini N4' (Aurora-Rose, 1998)                                         |
| AURR980102 | Normalized positional residue frequency at helix termini N''' (Aurora-Rose, 1998)                                        |
| AURR980103 | Normalized positional residue frequency at helix termini N'' (Aurora-Rose, 1998)                                         |
| AURR980104 | Normalized positional residue frequency at helix termini N' (Aurora-Rose, 1998)                                          |
| AURR980105 | Normalized positional residue frequency at helix termini Nc (Aurora-Rose, 1998)                                          |
| AURR980106 | Normalized positional residue frequency at helix termini N1 (Aurora-Rose, 1998)                                          |
| AURR980107 | Normalized positional residue frequency at helix termini N2 (Aurora-Rose, 1998)                                          |
| AURR980108 | Normalized positional residue frequency at helix termini N3 (Aurora-Rose, 1998)                                          |
| AURR980109 | Normalized positional residue frequency at helix termini N4 (Aurora-Rose, 1998)                                          |
| AURR980110 | Normalized positional residue frequency at helix termini N5 (Aurora-Rose, 1998)                                          |
| AURR980111 | Normalized positional residue frequency at helix termini C5 (Aurora-Rose, 1998)                                          |
| AURR980112 | Normalized positional residue frequency at helix termini C4 (Aurora-Rose, 1998)                                          |
| AURR980113 | Normalized positional residue frequency at helix termini C3 (Aurora-Rose, 1998)                                          |
| AURR980114 | Normalized positional residue frequency at helix termini C2 (Aurora-Rose, 1998)                                          |
| AURR980115 | Normalized positional residue frequency at helix termini C1 (Aurora-Rose, 1998)                                          |
| AURR980116 | Normalized positional residue frequency at helix termini Cc (Aurora-Rose, 1998)                                          |
| AURR980117 | Normalized positional residue frequency at helix termini C' (Aurora-Rose, 1998)                                          |
| AURR980118 | Normalized positional residue frequency at helix termini C'' (Aurora-Rose, 1998)                                         |
| AURR980119 | Normalized positional residue frequency at helix termini C''' (Aurora-Rose, 1998)                                        |
| AURR980120 | Normalized positional residue frequency at helix termini C4' (Aurora-Rose, 1998)                                         |
| ONEK900101 | Delta G values for the peptides extrapolated to 0 M urea (O'Neil-DeGrado, 1990)                                          |
| ONEK900102 | Helix formation parameters (delta delta G) (O'Neil-DeGrado, 1990)                                                        |
| VINM940101 | Normalized flexibility parameters (B-values), average (Vihinen et al., 1994)                                             |
| VINM940102 | Normalized flexibility parameters (B-values) for each residue surrounded by none rigid neighbours (Vihinen et al., 1994) |

| AAIndex    | Description                                                                                                              |
|------------|--------------------------------------------------------------------------------------------------------------------------|
| VINM940103 | Normalized flexibility parameters (B-values) for each residue surrounded by one rigid neighbours (Vihinen et al., 1994)  |
| VINM940104 | Normalized flexibility parameters (B-values) for each residue surrounded by two rigid neighbours (Vihinen et al., 1994)  |
| MUNV940101 | Free energy in alpha-helical conformation (Munoz-Serrano, 1994)                                                          |
| MUNV940102 | Free energy in alpha-helical region (Munoz-Serrano, 1994)                                                                |
| MUNV940103 | Free energy in beta-strand conformation (Munoz-Serrano, 1994)                                                            |
| MUNV940104 | Free energy in beta-strand region (Munoz-Serrano, 1994)                                                                  |
| MUNV940105 | Free energy in beta-strand region (Munoz-Serrano, 1994)                                                                  |
| WIMW960101 | Free energies of transfer of AcWL-X-LL peptides from bilayer interface to water (Wimley-White, 1996)                     |
| KIMC930101 | Thermodynamic beta sheet propensity (Kim-Berg, 1993)                                                                     |
| MONM990101 | Turn propensity scale for transmembrane helices (Monne et al., 1999)                                                     |
| BLAM930101 | Alpha helix propensity of position 44 in T4 lysozyme (Blaber et al., 1993)                                               |
| PARS000101 | p-Values of mesophilic proteins based on the distributions of B values (Parthasarathy-Murthy, 2000)                      |
| PARS000102 | p-Values of thermophilic proteins based on the distributions of B values (Parthasarathy-Murthy, 2000)                    |
| KUMS000101 | Distribution of amino acid residues in the 18 non-redundant families of thermophilic proteins (Kumar et al., 2000)       |
| KUMS000102 | Distribution of amino acid residues in the 18 non-redundant families of mesophilic proteins (Kumar et al., 2000)         |
| KUMS000103 | Distribution of amino acid residues in the alpha-helices in thermophilic proteins (Kumar et al., 2000)                   |
| KUMS000104 | Distribution of amino acid residues in the alpha-helices in mesophilic proteins (Kumar et al., 2000)                     |
| TAKK010101 | Side-chain contribution to protein stability (kJ/mol) (Takano-Yutani, 2001)                                              |
| FODM020101 | Propensity of amino acids within pi-helices (Fodje-Al-Karadaghi, 2002)                                                   |
| NADH010101 | Hydropathy scale based on self-information values in the two-state model (5 accessibility) (Naderi-Manesh et al., 2001)  |
| NADH010102 | Hydropathy scale based on self-information values in the two-state model (9 accessibility) (Naderi-Manesh et al., 2001)  |
| NADH010103 | Hydropathy scale based on self-information values in the two-state model (16 accessibility) (Naderi-Manesh et al., 2001) |
| NADH010104 | Hydropathy scale based on self-information values in the two-state model (20 accessibility) (Naderi-Manesh et al., 2001) |
| NADH010105 | Hydropathy scale based on self-information values in the two-state model (25 accessibility) (Naderi-Manesh et al., 2001) |
| NADH010106 | Hydropathy scale based on self-information values in the two-state model                                                 |

| AAIndex    | Description                                                                                                              |
|------------|--------------------------------------------------------------------------------------------------------------------------|
|            | (36 accessibility) (Naderi-Manesh et al., 2001)                                                                          |
| NADH010107 | Hydropathy scale based on self-information values in the two-state model (50 accessibility) (Naderi-Manesh et al., 2001) |
| MONM990201 | Averaged turn propensities in a transmembrane helix (Monne et al., 1999)                                                 |
| KOEP990101 | Alpha-helix propensity derived from designed sequences (Koehl-Levitt, 1999)                                              |
| KOEP990102 | Beta-sheet propensity derived from designed sequences (Koehl-Levitt, 1999)                                               |
| CEDJ970101 | Composition of amino acids in extracellular proteins (percent) (Cedano et al., 1997)                                     |
| CEDJ970102 | Composition of amino acids in anchored proteins (percent) (Cedano et al., 1997)                                          |
| CEDJ970103 | Composition of amino acids in membrane proteins (percent) (Cedano et al., 1997)                                          |
| CEDJ970104 | Composition of amino acids in intracellular proteins (percent) (Cedano et al., 1997)                                     |
| CEDJ970105 | Composition of amino acids in nuclear proteins (percent) (Cedano et al., 1997)                                           |
| FUKS010101 | Surface composition of amino acids in intracellular proteins of thermophiles (percent) (Fukuchi-Nishikawa, 2001)         |
| FUKS010102 | Surface composition of amino acids in intracellular proteins of mesophiles (percent) (Fukuchi-Nishikawa, 2001)           |
| FUKS010103 | Surface composition of amino acids in extracellular proteins of mesophiles (percent) (Fukuchi-Nishikawa, 2001)           |
| FUKS010104 | Surface composition of amino acids in nuclear proteins (percent) (Fukuchi-Nishikawa, 2001)                               |
| FUKS010105 | Interior composition of amino acids in intracellular proteins of thermophiles (percent) (Fukuchi-Nishikawa, 2001)        |
| FUKS010106 | Interior composition of amino acids in intracellular proteins of mesophiles (percent) (Fukuchi-Nishikawa, 2001)          |
| FUKS010107 | Interior composition of amino acids in extracellular proteins of mesophiles (percent) (Fukuchi-Nishikawa, 2001)          |
| FUKS010108 | Interior composition of amino acids in nuclear proteins (percent) (Fukuchi-Nishikawa, 2001)                              |
| FUKS010109 | Entire chain composition of amino acids in intracellular proteins of thermophiles (percent) (Fukuchi-Nishikawa, 2001)    |
| FUKS010110 | Entire chain composition of amino acids in intracellular proteins of mesophiles (percent) (Fukuchi-Nishikawa, 2001)      |
| FUKS010111 | Entire chain composition of amino acids in extracellular proteins of mesophiles (percent) (Fukuchi-Nishikawa, 2001)      |
| FUKS010112 | Entire chain composition of amino acids in nuclear proteins (percent) (Fukuchi-Nishikawa, 2001)                          |
| MITS020101 | Amphiphilicity index (Mitaku et al., 2002)                                                                               |
| TSAJ990101 | Volumes including the crystallographic waters using the ProtOr (Tsai et al., 1999)                                       |
| TSAJ990102 | Volumes not including the crystallographic waters using the ProtOr (Tsai et al., 1999)                                   |
| COSI940101 | Electron-ion interaction potential values (Cosic, 1994)                                                                  |
| PONP930101 | Hydrophobicity scales (Ponnuswamy, 1993)                                                                                 |
| WILM950101 | Hydrophobicity coefficient in RP-HPLC, C18 with 0.1%TFA/MeCN/H2O (Wilce et al. 1995)                                     |
| WILM950102 | Hydrophobicity coefficient in RP-HPLC, C8 with 0.1%TFA/MeCN/H2O (Wilce et al. 1995)                                      |
| WILM950103 | Hydrophobicity coefficient in RP-HPLC, C4 with 0.1%TFA/MeCN/H2O (Wilce et al. 1995)                                      |
| WILM950104 | Hydrophobicity coefficient in RP-HPLC, C18 with 0.1%TFA/2-PrOH/MeCN/H2O (Wilce et al. 1995)                              |
| KUHL950101 | Hydrophilicity scale (Kuhn et al., 1995)                                                                                 |
| GUOD860101 | Retention coefficient at pH 2 (Guo et al., 1986)                                                                         |
| JURD980101 | Modified Kyte-Doolittle hydrophobicity scale (Juretic et al., 1998)                                                      |
